# Supplementary material
Source: PubMed Central journal article supplement (PMC4873686)
Supplement: supp_WNL.0000000000002582_Tables.pdf [file supp_WNL.0000000000002582_Tables.pdf]

**Supplemental Table e-1. Association of Light Physical Activity and Moderate to Heavy Physical Activity and Baseline Cognitive Performance by Domain**

|                                                           | Processing Speed   |       | Executive Function |       | Semantic Memory   |       | Episodic Memory    |       |
|-----------------------------------------------------------|--------------------|-------|--------------------|-------|-------------------|-------|--------------------|-------|
|                                                           | Beta* $\pm$ se     | P     | Beta* $\pm$ se     | P     | Beta* $\pm$ se    | P     | Beta* $\pm$ se     | P     |
| <b>Total Sample (N=1228)</b>                              |                    |       |                    |       |                   |       |                    |       |
| <b>Light Physical Activity vs no activity</b>             |                    |       |                    |       |                   |       |                    |       |
| Model 1                                                   | 0.008 $\pm$ 0.043  | 0.847 | -0.004 $\pm$ 0.050 | 0.941 | 0.026 $\pm$ 0.041 | 0.530 | -0.009 $\pm$ 0.049 | 0.856 |
| Model 2                                                   | -0.007 $\pm$ 0.045 | 0.882 | -0.007 $\pm$ 0.050 | 0.891 | 0.030 $\pm$ 0.041 | 0.468 | -0.017 $\pm$ 0.049 | 0.730 |
| Model 3                                                   | 0.013 $\pm$ 0.045  | 0.766 | -0.009 $\pm$ 0.050 | 0.861 | 0.027 $\pm$ 0.041 | 0.510 | -0.008 $\pm$ 0.049 | 0.872 |
| <b>Moderate to Heavy Physical Activity vs no activity</b> |                    |       |                    |       |                   |       |                    |       |
| Model 1                                                   | 0.153 $\pm$ 0.079  | 0.043 | 0.164 $\pm$ 0.083  | 0.048 | 0.145 $\pm$ 0.068 | 0.034 | 0.142 $\pm$ 0.082  | 0.083 |
| Model 2                                                   | 0.112 $\pm$ 0.075  | 0.137 | 0.122 $\pm$ 0.083  | 0.141 | 0.131 $\pm$ 0.069 | 0.057 | 0.112 $\pm$ 0.082  | 0.175 |
| Model 3                                                   | 0.135 $\pm$ 0.075  | 0.073 | 0.160 $\pm$ 0.083  | 0.055 | 0.134 $\pm$ 0.068 | 0.051 | 0.132 $\pm$ 0.082  | 0.107 |
| <b>Unimpaired at Baseline (N=980)</b>                     |                    |       |                    |       |                   |       |                    |       |
| <b>Light Physical Activity vs no activity</b>             |                    |       |                    |       |                   |       |                    |       |
| Model 1                                                   | -0.041 $\pm$ 0.044 | 0.352 | 0.035 $\pm$ 0.048  | 0.467 | 0.018 $\pm$ 0.043 | 0.682 | -0.004 $\pm$ 0.049 | 0.935 |
| Model 2                                                   | -0.061 $\pm$ 0.043 | 0.159 | 0.020 $\pm$ 0.047  | 0.676 | 0.020 $\pm$ 0.043 | 0.640 | -0.013 $\pm$ 0.049 | 0.796 |
| Model 3                                                   | -0.033 $\pm$ 0.043 | 0.451 | 0.034 $\pm$ 0.048  | 0.475 | 0.020 $\pm$ 0.433 | 0.644 | -0.001 $\pm$ 0.049 | 0.986 |
| <b>Moderate to Heavy Physical Activity vs no activity</b> |                    |       |                    |       |                   |       |                    |       |
| Model 1                                                   | 0.125 $\pm$ 0.067  | 0.065 | 0.141 $\pm$ 0.073  | 0.057 | 0.106 $\pm$ 0.041 | 0.112 | 0.120 $\pm$ 0.076  | 0.116 |
| Model 2                                                   | 0.086 $\pm$ 0.067  | 0.204 | 0.100 $\pm$ 0.074  | 0.176 | 0.091 $\pm$ 0.067 | 0.173 | 0.100 $\pm$ 0.077  | 0.198 |
| Model 3                                                   | 0.120 $\pm$ 0.067  | 0.076 | 0.136 $\pm$ 0.074  | 0.067 | 0.098 $\pm$ 0.067 | 0.142 | 0.115 $\pm$ 0.077  | 0.134 |

Model 1: adjusted for age, sex, education, Medicare status, crystallized abilities, and time from baseline to first cognitive assessment

Model 2: model 1 plus modifiable vascular risk factors (smoking status, moderate alcohol consumption, body mass index, hypertension, diabetes)

Model 3: model 2 including magnetic resonance imaging markers (infarct, white matter disease, atrophy)

\* beta represents the average z-score difference in NPE at baseline between those with light physical activity or moderate to heavy physical activity and no physical activity (as a reference)

**Supplemental Table e-2. Association of Light Physical Activity and Moderate to Heavy Physical Activity and Change in Cognitive Performance**

|                                            | Processing Speed   |       | Executive Function |       | Semantic Memory    |       | Episodic Memory    |       |
|--------------------------------------------|--------------------|-------|--------------------|-------|--------------------|-------|--------------------|-------|
|                                            | Beta* $\pm$ se     | P     |
| <b>Total Sample (N=876)</b>                |                    |       |                    |       |                    |       |                    |       |
| <b>Light Physical Activity</b>             |                    |       |                    |       |                    |       |                    |       |
| Model 1                                    | 0.010 $\pm$ 0.071  | 0.886 | 0.034 $\pm$ 0.072  | 0.641 | -0.040 $\pm$ 0.072 | 0.580 | -0.237 $\pm$ 0.071 | 0.001 |
| Model 2                                    | -0.003 $\pm$ 0.071 | 0.969 | 0.025 $\pm$ 0.072  | 0.733 | -0.034 $\pm$ 0.072 | 0.639 | -0.244 $\pm$ 0.071 | 0.001 |
| Model 3                                    | 0.021 $\pm$ 0.072  | 0.774 | 0.033 $\pm$ 0.073  | 0.656 | -0.036 $\pm$ 0.072 | 0.621 | -0.240 $\pm$ 0.072 | 0.001 |
| <b>Moderate to Heavy Physical Activity</b> |                    |       |                    |       |                    |       |                    |       |
| Model 1                                    | 0.259 $\pm$ 0.118  | 0.028 | 0.057 $\pm$ 0.120  | 0.633 | 0.026 $\pm$ 0.119  | 0.826 | 0.094 $\pm$ 0.121  | 0.436 |
| Model 2                                    | 0.230 $\pm$ 0.119  | 0.053 | 0.009 $\pm$ 0.121  | 0.943 | 0.027 $\pm$ 0.120  | 0.822 | 0.092 $\pm$ 0.122  | 0.452 |
| Model 3                                    | 0.249 $\pm$ 0.119  | 0.036 | 0.047 $\pm$ 0.121  | 0.696 | -0.003 $\pm$ 0.120 | 0.983 | 0.090 $\pm$ 0.122  | 0.461 |
| <b>Unimpaired at Baseline (N=728)</b>      |                    |       |                    |       |                    |       |                    |       |
| <b>Light Physical Activity</b>             |                    |       |                    |       |                    |       |                    |       |
| Model 1                                    | 0.051 $\pm$ 0.078  | 0.519 | 0.072 $\pm$ 0.078  | 0.352 | 0.029 $\pm$ 0.075  | 0.700 | -0.191 $\pm$ 0.076 | 0.012 |
| Model 2                                    | 0.026 $\pm$ 0.079  | 0.740 | 0.051 $\pm$ 0.078  | 0.513 | 0.029 $\pm$ 0.075  | 0.698 | -0.191 $\pm$ 0.076 | 0.012 |
| Model 3                                    | 0.057 $\pm$ 0.079  | 0.467 | 0.074 $\pm$ 0.078  | 0.346 | 0.032 $\pm$ 0.075  | 0.675 | -0.198 $\pm$ 0.076 | 0.009 |
| <b>Moderate to Heavy Physical Activity</b> |                    |       |                    |       |                    |       |                    |       |
| Model 1                                    | 0.270 $\pm$ 0.123  | 0.029 | 0.084 $\pm$ 0.122  | 0.491 | 0.087 $\pm$ 0.118  | 0.461 | 0.130 $\pm$ 0.121  | 0.286 |
| Model 2                                    | 0.240 $\pm$ 0.124  | 0.054 | 0.034 $\pm$ 0.123  | 0.780 | 0.090 $\pm$ 0.119  | 0.449 | 0.142 $\pm$ 0.123  | 0.247 |
| Model 3                                    | 0.255 $\pm$ 0.124  | 0.040 | 0.076 $\pm$ 0.123  | 0.538 | 0.061 $\pm$ 0.119  | 0.610 | 0.133 $\pm$ 0.122  | 0.275 |

Model 1: adjusted for sex, Medicare status, crystallized abilities, and time from baseline to first cognitive assessment

Model 2: model 1 plus modifiable vascular risk factors (smoking status, moderate alcohol consumption, body mass index, hypertension, diabetes)

Model 3: model 2 including magnetic resonance imaging markers (infarct, white matter disease, atrophy)

\* beta represents the average z-score difference in NPE at baseline between those with a MET score of 0-3 or 3-6 and MET score >6 (as a reference)
